# Supplementary material for: A cancer-favoring oncolytic vaccinia virus shows enhanced suppression of stem-cell like colon cancer
Source: PubMed Central journal article supplement (PMC4941329; doi:10.18632/oncotarget.7660), 2016-02-24
Supplement: oncotarget-07-16479-s001.pdf [file oncotarget-07-16479-s001.pdf]

# A cancer-favoring oncolytic vaccinia virus shows enhanced suppression of stem-cell like colon cancer

## Supplementary Materials

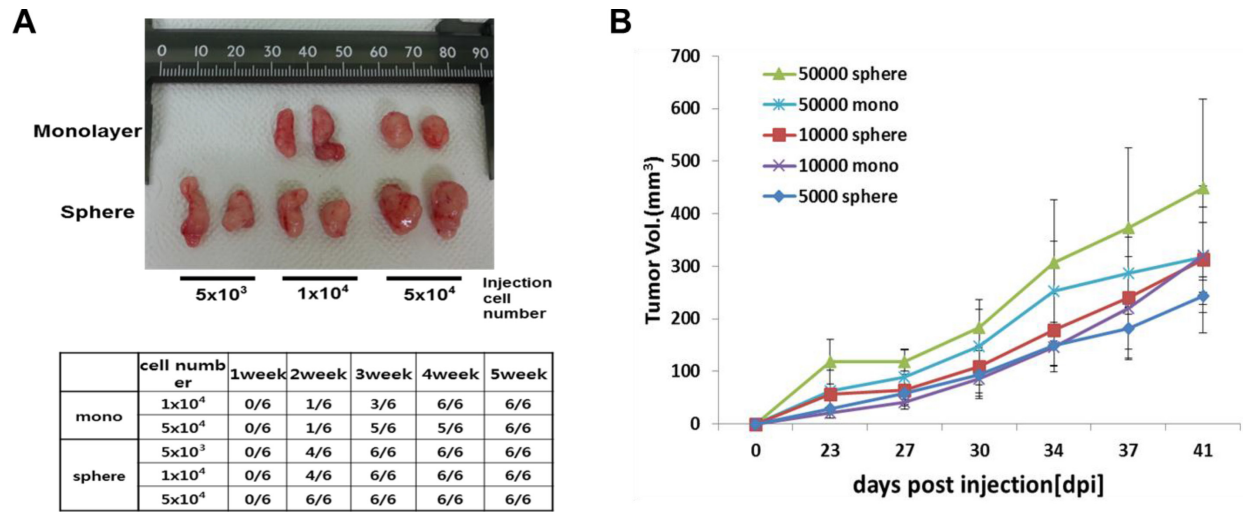

**Supplementary Figure S1: The sphere-forming ability relates to cancer stemness and tumorigenicity.** (A) Tumorigenicity of different numbers of monolayer or sphere HT29 cells in the xenograft at 5 weeks after injection. (B) Tumor volumes formed by injection with different numbers of monolayer or sphere HT29 cells in xenografts.
